# Supplementary material
Source: publisher figshare collection journal article supplement (https://aacr.figshare.com/articles/dataset/_/23553198)
Supplement: Supplementary file 1 [file 41323707]

# Supplementary Figure S1

**A**

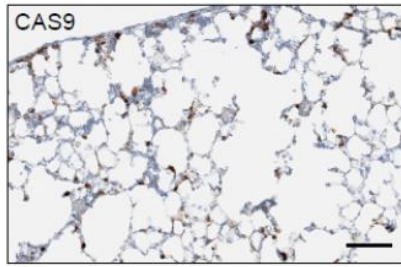

**B**

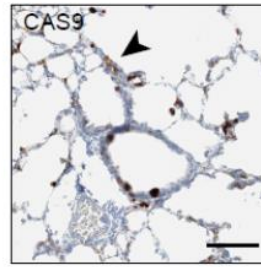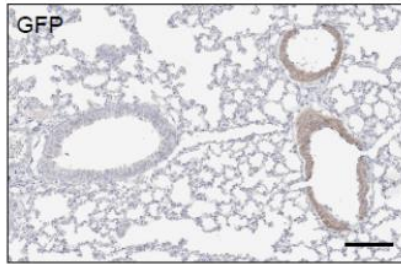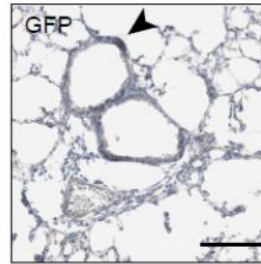

**C**

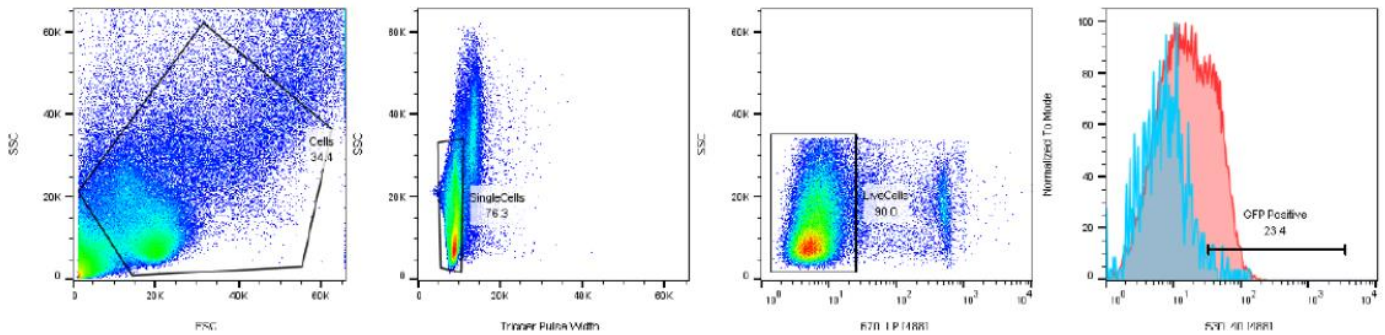

**D**

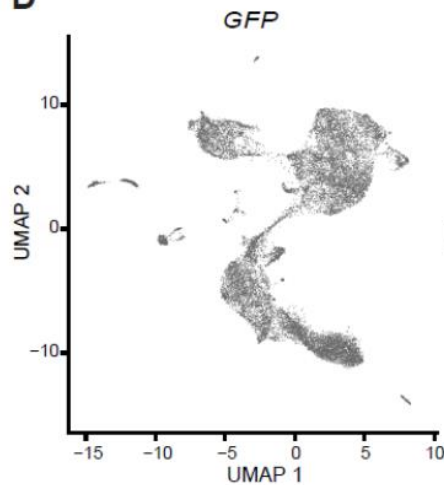

**Supplementary Figure S1 | Validation of the autochthonous barcoding model. A,** Separate lung sections displaying positivity for both CAS9 and GFP. **B,** Co-staining of representative sections showing colocalization of both CAS9 and GFP. **C,** Flow-sorting strategy for isolating GFP+ cells from harvested lungs transduced with Adeno-Cre and the AAV-LBC viruses. **D,** UMAP plot displaying expression of GFP in the autochthonous scRNA-seq data.
